# Supplementary material for: The Annotated Bibliography and Citation Behavior: Enhancing Student Scholarship in an Undergraduate Biology Course
Source: Atypon-hosted journal article supplement (doi:10.1187/cbe.07-04-0022), 2007-12-01
Supplement: appendix_1.pdf [file appendix_1.pdf]

**Appendix 1.** Original BIO 352 Research Project Assignment, 2000

**Biology 352 Research Paper**

The research paper for Biology 352 will focus on a topic related to either Immunology or Parasitology (Immunoparasitology is a sub-field of its own). The paper should concentrate on a specific topic within these broad fields and be a topic for which current research (within the last few years) is available. It is usually best to be as specific as possible as broad topics within these fields of intense current research can provide too much information.

I expect that the research paper will be approximately 10-12 pages in length (can be longer) and will include at least 3 primary literature citations (articles) describing current research into your chosen topic. You can use review articles, media sources, and Internet sources, but these are usually distinct from primary literature which is found only in scientific journals. Some of these journals are to be found within the Concordia library but for many articles you will need to order copies via the interlibrary loan program. The loan program requires some time to acquire the articles you order so it is best to plan ahead.

The below dates are designated to start you thinking about a potential topic and start investigating information on that topic. Feel free to ask me about potential topics and how to find information on your topic.

**Due Dates:**

- 1) Topic (relevant to some aspect of Immunology or Parasitology) should be approved by March 7<sup>th</sup> or sooner.
- 2) Annotated bibliography consisting of at least 5 literature citations (including at least 3 primary literature citations) and two or three sentence summaries are due by March 19<sup>th</sup> or sooner.
- 3) Final paper due on Monday, April 11<sup>th</sup>.
